# Supplementary material for: Phospholipid dynamics in ex vivo lung cancer and normal lung explants
Source: PubMed Central journal article supplement (PMC8080582; doi:10.1038/s12276-020-00547-x), 2021-01-06

## Supplementary figure legends – Lesko et al.

**Supplementary Fig. S1. Isotopologue abundance of PL fragments not containing glycerol in lung and tumor explants.** After 72 hours of culture in [<sup>13</sup>C<sub>6</sub>]glucose either under nonstarvation conditions (**a**) or starvation conditions (**b**), isotopologue abundance of PL fragments not containing glycerol was analyzed as a control. Natural abundance-corrected data from four (**a**) or three (**b**) patients are shown as mean +/- SEM. PC, phosphatidylcholine; PE, phosphatidylethanolamine; PI, phosphatidylinositol; Lu, lung; Tu, tumor; n.s. non-significant.

**Supplementary Fig. 2. Expression of PL biosynthesis genes in lung squamous cell carcinoma and non-involved lung tissue.** Gene expression in lung squamous cell carcinoma (LUSC, n = 501) and in non-involved lung tissue (Lung, n = 49) from the publically available LUSC TCGA dataset. Results are grouped according to the involvement of the enzymes in the biosynthesis of PE (phosphatidylethanolamine), PC (phosphatidylcholine), or PI (phosphatidylinositol). Data was obtained via the XENA database (<https://xenabrowser.net>). Group comparisons were performed by Mann-Whitney-U-tests. \*  $P < 0.05$ ; \*\*\*  $P < 0.001$ .

Fig. S1

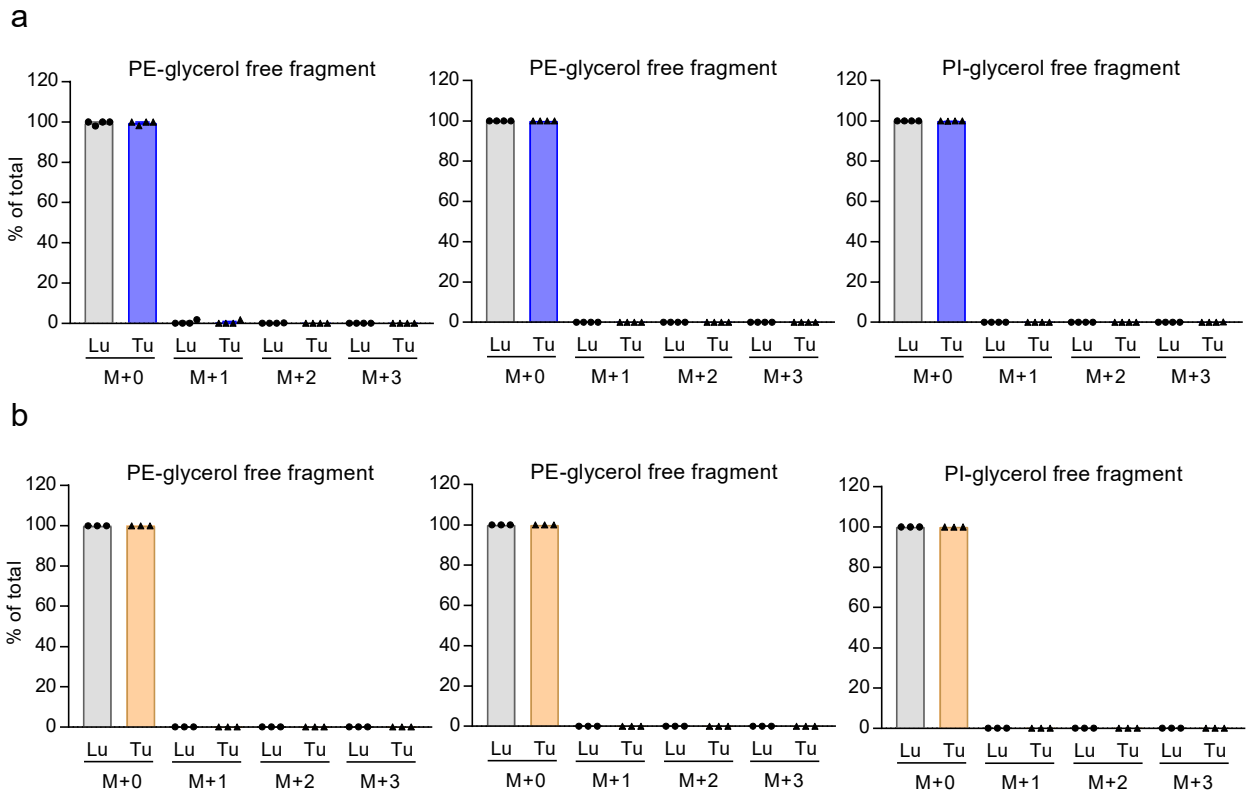

Fig. S2

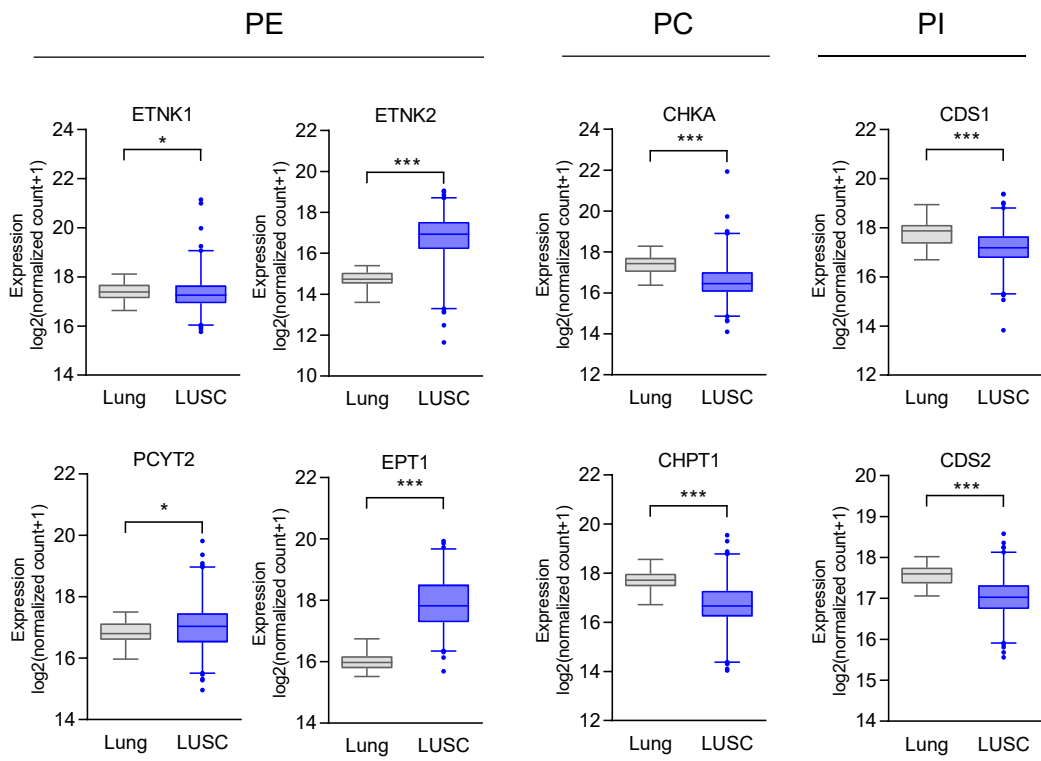

Supplement: 12276_2020_547_MOESM1_ESM.pdf [file 12276_2020_547_MOESM1_ESM.pdf]
